# Supplementary material
Source: PubMed Central journal article supplement (PMC6331548)
Supplement: 41396_2018_292_MOESM1_ESM.pdf [file 41396_2018_292_MOESM1_ESM.pdf]

# Supplementary Information

## Pangenomic Comparison of Globally Distributed Poribacteria Associated with Sponge Hosts and Marine Particles

Sheila Podell, Jessica M. Blanton, Alexander Neu, Vinayak Agarwal, Jason S. Biggs, Bradley S. Moore, Eric E. Allen

### Contents

|                                   |    |
|-----------------------------------|----|
| Supplementary Figures S1-S6 ..... | 2  |
| Supplementary Tables S1-S5.....   | 11 |
| References .....                  | 24 |

**Supplementary Figure S1. Sponge host sample characteristics.** *Dysidea granulosa*, *Pseudoceratina sp.*, and *Melophlus sarasinorum* photos by Dr. Jason Biggs, University of Guam. *Agelas tubulata* photo by Tamara Schwent of the Sirenas Collection team.

|                 | <i>Dysidea granulosa</i> | <i>Pseudoceratina sp.</i>           | <i>Melophlus sarasinorum</i>        | <i>Agelas tubulata</i>       |
|-----------------|--------------------------|-------------------------------------|-------------------------------------|------------------------------|
| Sample name     | GUM098                   | GUM146                              | GUM22                               | SBM112                       |
| NCBI Biosample  | SAMN04939370             | SAMN08482400                        | SAMN08501426                        | SAMN08501975                 |
| collection date | 7/1/2015                 | 7/7/2015                            | 6/29/2015                           | 1/13/2014                    |
| sample location | Piti Bomb Holes<br>Guam  | San Louis Beach<br>Santa Rita, Guam | Western Shoals<br>Apra Harbor, Guam | St. Thomas<br>Virgin Islands |
| latitude        | 13.345738 N              | 13.4428 N                           | 13.451324 N                         | 18.309517 N                  |
| longitude       | 144.638186 E             | 144.6487 E                          | 144.655623 E                        | 64.96135 W                   |
| depth           | 5 ft                     | 28 ft                               | 29 ft                               | 40 ft                        |

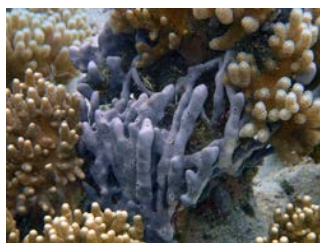

3 cm

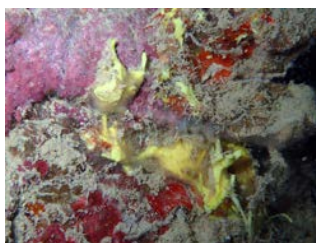

3 cm

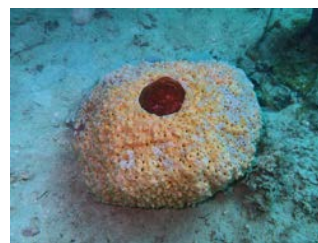

8 cm

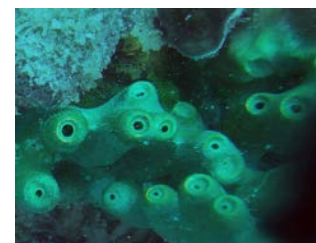

5 cm

**Supplementary Figure S2. 16S rRNA tree.** Blue text indicates Tara Oceans metagenome-assembled genomes. Red text indicates sequences obtained from sponge tissue-derived MAGs and SAGs. Bolded text marks sequences generated by the current study, with host abbreviations *Agelas tubulata*, AG; *Dysidea granulosa*, DG; *Melophlus sarasinorum*, MS; *Pseudoceratina sp.*, PC; *Aplysina aerophoba*, WGA MPMY, and MPMS. Tara Oceans genomes are italicized, with geographic abbreviations ARS, Arabian Sea; RS, Red Sea; MED Mediterranean Sea; NAT, North Atlantic; SAT, South Atlantic; NP, North Pacific; SP, South Pacific. Codes G1-G5 (appended with underscores) designate 16S rRNA gene fragments previously classified by other investigators [1, 2]. Outgroup abbreviation Rhodopirellula indicates *Rhodopirellula baltica* strain SH1. Minimum 16S gene length was 700 nt.

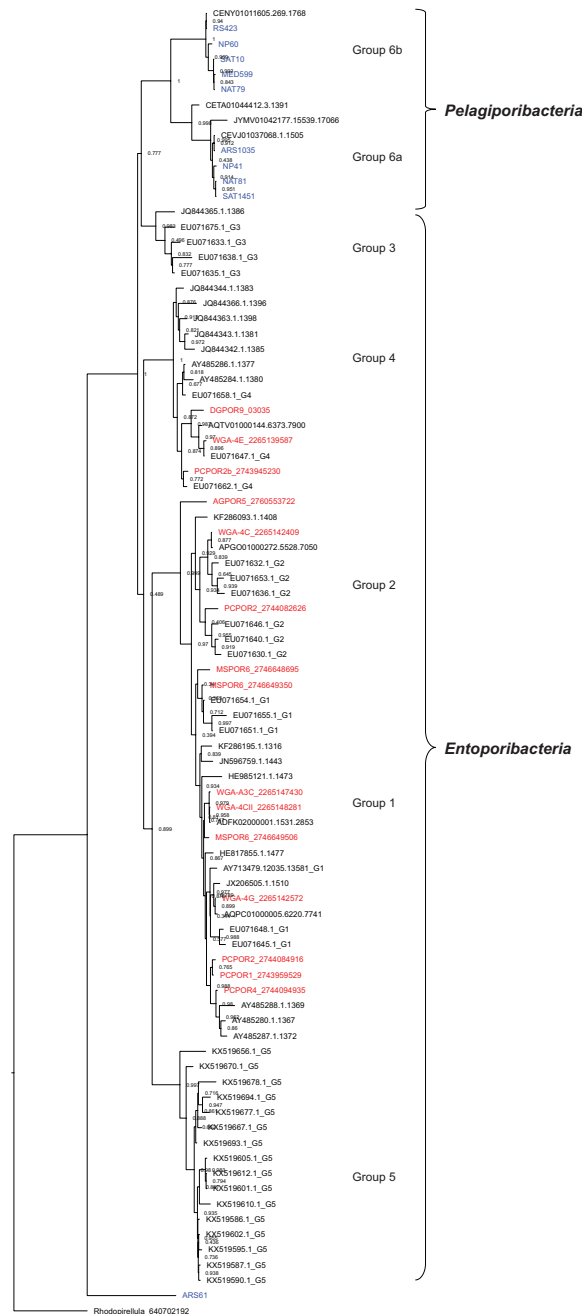

**Supplementary Figure S3a: 16S rRNA gene similarity matrix.** Areas shaded in darker colors indicate closer evolutionary relationships. Abbreviation RB\_SH1 indicates *Rhodopirellula baltica* strain SH1. Minimum 16S gene length was 700 nt. Values > 97% typically define members of the same species, while values between 95%-97% suggest membership in the same genus. Percent identity values were calculated based on the longest alignment > 400 nt obtained by BLASTN search. Zero values indicate relationships that could not be determined due to fragmented or missing 16S rRNA genes.

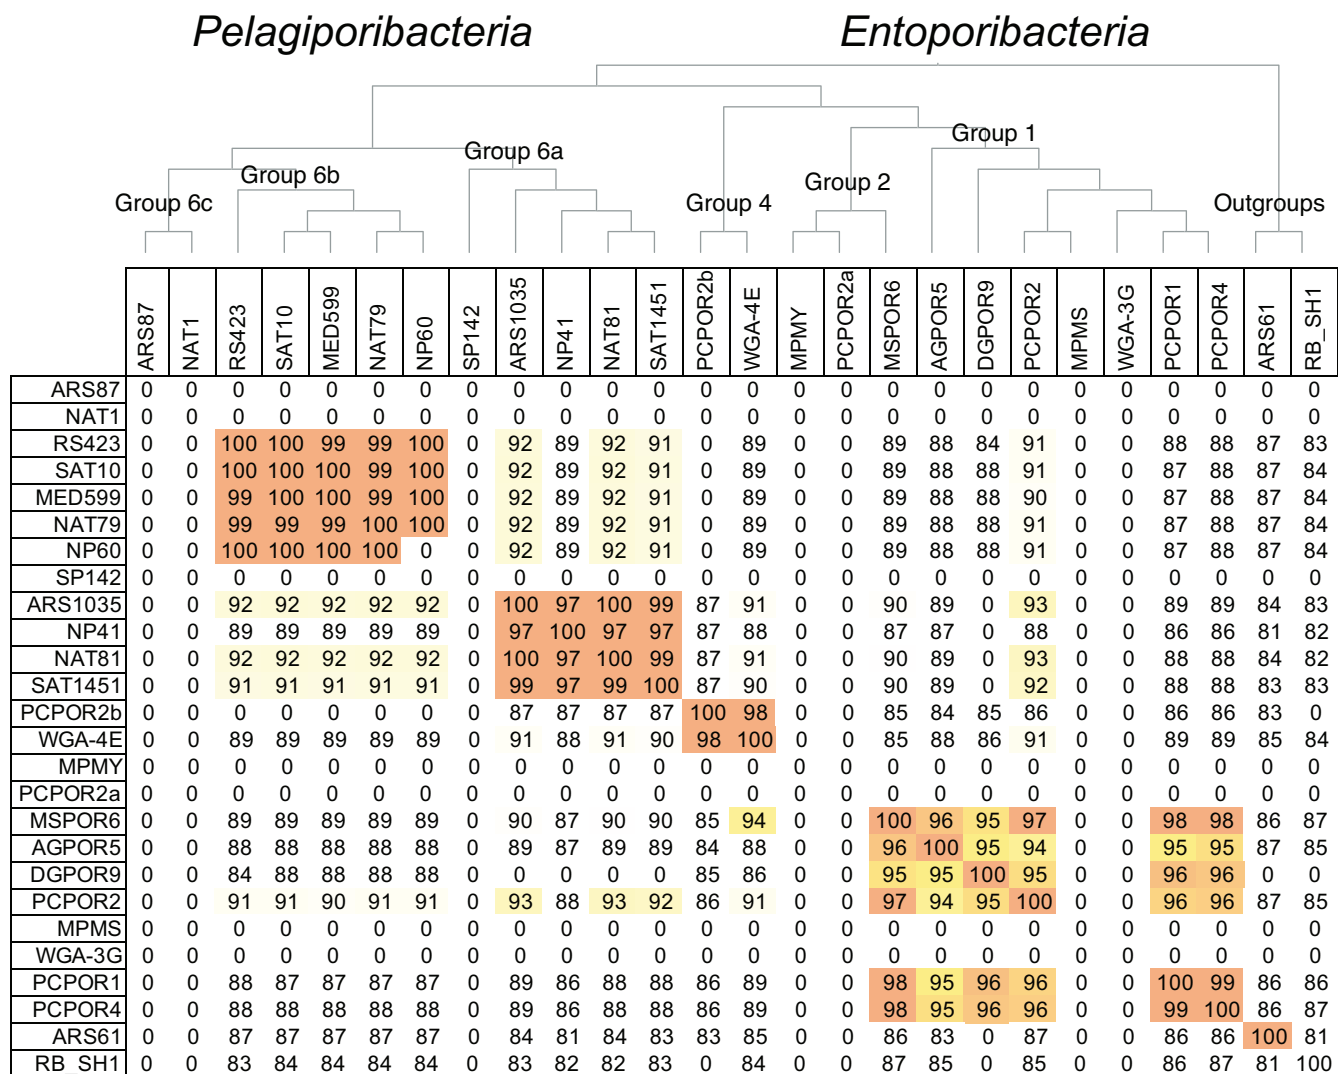

**Supplementary Figure S3b: Average nucleotide identity (ANI) similarity matrix.** Areas shaded in darker colors indicate closer evolutionary relationships. Abbreviation RB\_SH1 indicates *Rhodopirellula baltica* strain SH1. AAI values > 95% typically define members of the same species, while values between 88%-95% suggest membership in the same genus. Zeros indicate values < 75%, where the ANI metric has been shown to lose its reliability, and average amino acid identity (AAI) is recommended to be used instead [3].

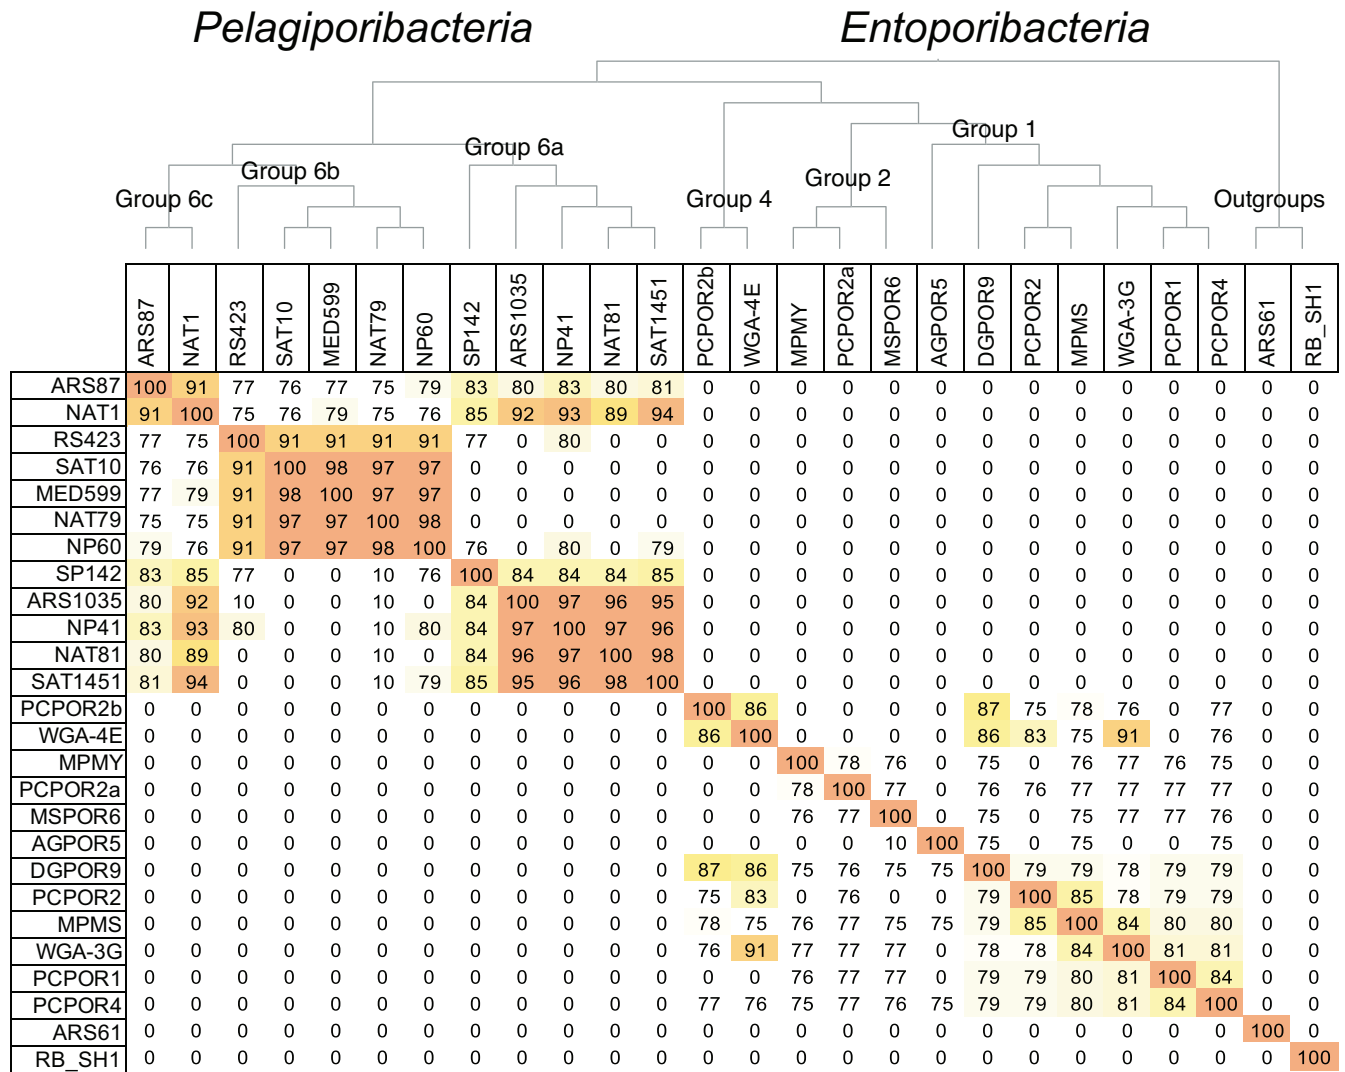

**Supplementary Figure S4: *Entoporibacteria* and *Pelagiporibacteria* subgroup protein family clusters.** Shared families are defined as ProteinOrtho clusters found in one or more genomes from each different lineage. Subgroup overlap labels refer to groups of genomes defined by taxonomic placement in both the concatenated multilocus tree (Figure 2) and average amino acid identity clustering cladogram (Figure 3).

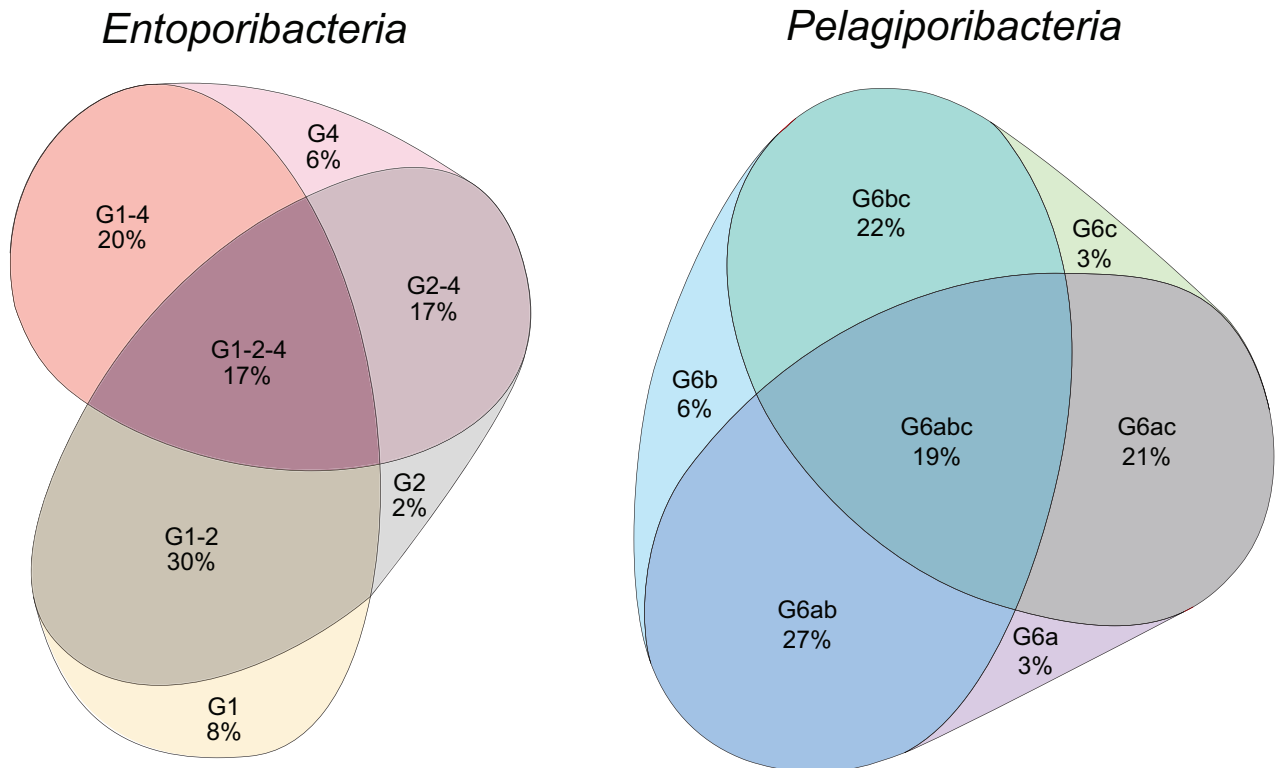

**Supplementary Figure S5 : 16S rRNA primer effects on relative abundance of different taxa in four different sponge hosts.** Abbreviations: P1, 16S primer set 515FB/806RB; P2, 16S primer set 515Fsp/806Rsp.

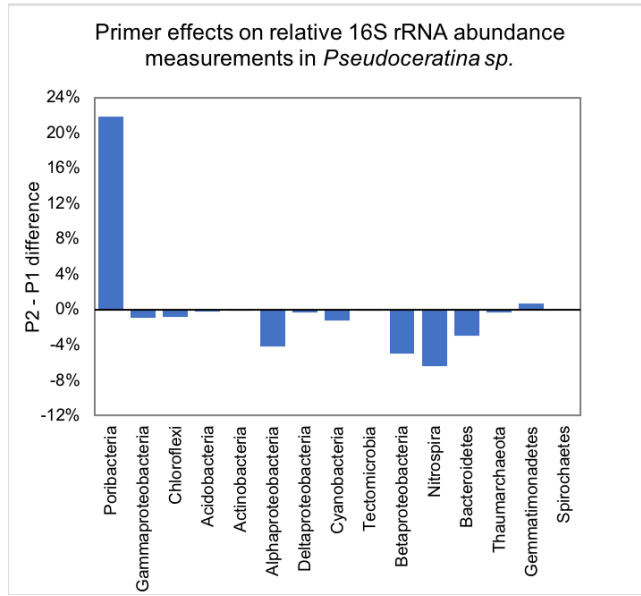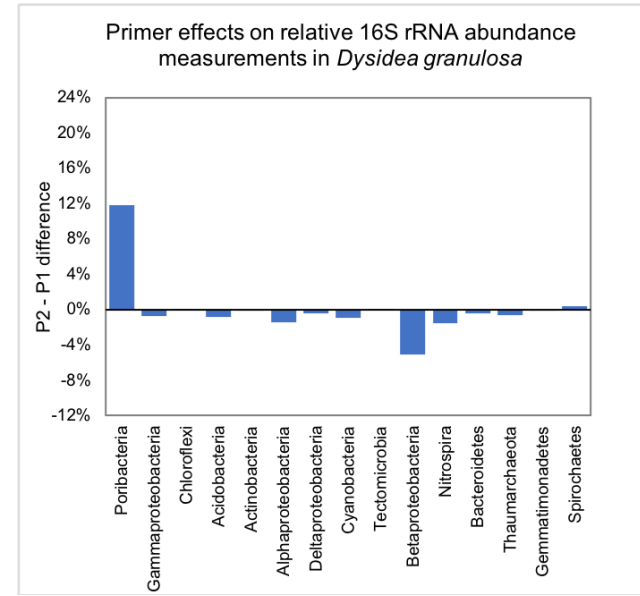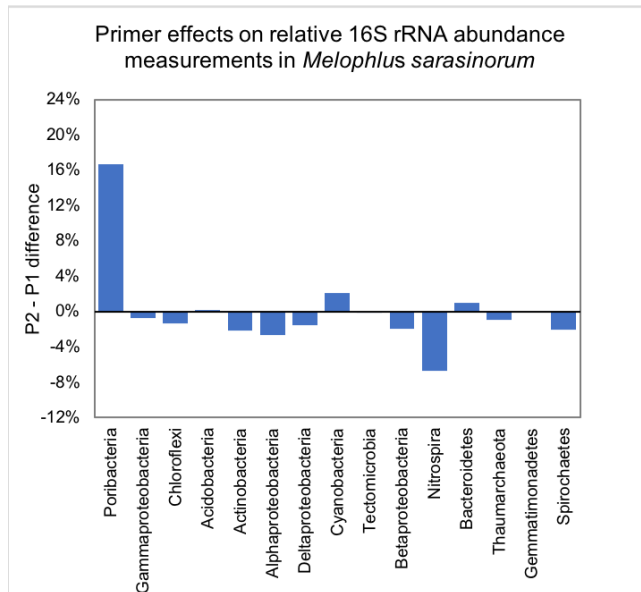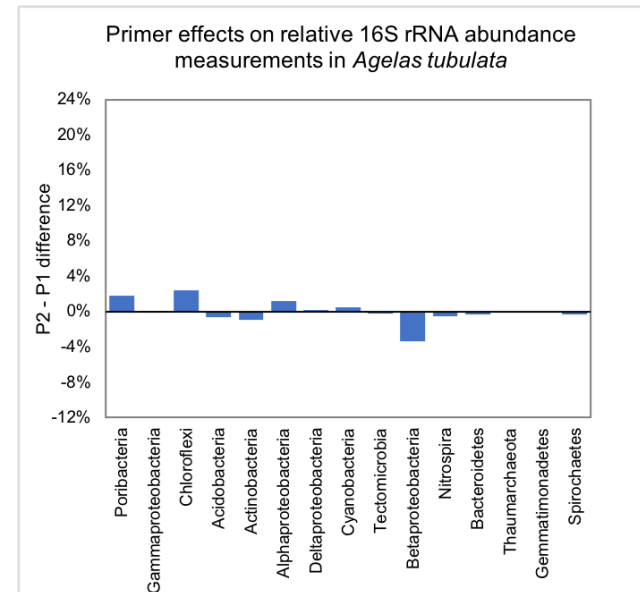

**Supplementary Figure S6a: 16S rRNA primer mismatches.** Calculated based on 16S rRNA sequence alignments to full-length, metagenomically assembled Poribacteria genome sequences.

| genome name | 27F [4] | 341F [5] | 515Fb [6] | 515Fsp * | 784F [7] | 785R [5] | 806Rb [6] | 806Rsp * | 1061R [8] | 1492R [4] | sub-group                     |
|-------------|---------|----------|-----------|----------|----------|----------|-----------|----------|-----------|-----------|-------------------------------|
| PCPOR1      | 3       | 0        | 1         | 0        | 2        | 2        | 1         | 0        | 0         | 0         | <i>Entoporibacteria</i> G1    |
| PCPOR2      | 3       | 0        | 1         | 0        | 2        | 2        | 1         | 0        | 0         | 0         | <i>Entoporibacteria</i> G1    |
| PCPOR4      | 3       | 0        | 1         | 0        | 2        | 2        | 1         | 0        | 0         | 0         | <i>Entoporibacteria</i> G1    |
| AGPOR5      | 3       | 0        | 1         | 0        | 2        | 2        | 1         | 0        | 0         | 0         | <i>Entoporibacteria</i> G2    |
| WGA-4E      | 3       | 0        | 1         | 0        | 2        | 1        | 1         | 0        | 0         | 0         | <i>Entoporibacteria</i> G4    |
| SAT1451     | 3       | 0        | 1         | 0        | 2        | 1        | 0         | 0        | 0         | 0         | <i>Pelagiporibacteria</i> G6a |
| NAT81       | 3       | 0        | 1         | 0        | 2        | 1        | 0         | 0        | 0         | 0         | <i>Pelagiporibacteria</i> G6a |
| ARS1035     | 3       | 0        | 1         | 0        | 2        | 1        | 0         | 0        | 0         | 0         | <i>Pelagiporibacteria</i> G6a |
| NP41        | 3       | 0        | 1         | 0        | 2        | 1        | 0         | 0        | 0         | 0         | <i>Pelagiporibacteria</i> G6b |
| SAT10       | 3       | 0        | 1         | 0        | 2        | 0        | 0         | 0        | 0         | 0         | <i>Pelagiporibacteria</i> G6b |
| NAT79       | 3       | 0        | 1         | 0        | 2        | 0        | 0         | 0        | 0         | 0         | <i>Pelagiporibacteria</i> G6b |
| NP60        | 3       | 0        | 1         | 0        | 2        | 0        | 0         | 0        | 0         | 0         | <i>Pelagiporibacteria</i> G6b |
| RS423       | 3       | 0        | 1         | 0        | 2        | 0        | 0         | 0        | 0         | 0         | <i>Pelagiporibacteria</i> G6b |
| MED599      | 3       | 0        | 1         | 0        | 2        | 0        | 0         | 0        | 0         | 0         | <i>Pelagiporibacteria</i> G6b |
| ARS61       | 3       | 0        | 1         | 0        | 0        | 0        | 0         | 0        | 0         | 0         | unclassified                  |

\* specifically designed for this study.



**Supplementary Figure S6b: 16S rRNA sequence mismatch localizations for primer 515FB.** This table contains additional partial sequences that could not be included in Supplementary Figure S6a because they did not cover all primers. Sequence identifiers beginning with "Ga02" and "POR" refer to JGI Integrated Microbial Genome Pipeline locus ids.

| <b>sponge host</b>               | <b>sequence_id</b>         | <b>sequence</b>     | <b>reference</b>           |
|----------------------------------|----------------------------|---------------------|----------------------------|
|                                  | 515FB == 515F-Y            | GTGYCAGCMGCCGCGGTAA |                            |
| <i>Agelas tubulata</i>           | AGPOR5 Ga0227391_12124     | GTGCCAGCAGCTGCGGTAA | This study                 |
| <i>Dysidea granulosa</i>         | DGPOR9 Ga0236299_105113    | GTGCCAGCAGCTGCGGTAA | This study                 |
| <i>Melophlus sarasinorum</i>     | MSPOR6 Ga0207211_14795     | GTGCCAGCAGCTGCGGTAA | This study                 |
| <i>Melophlus sarasinorum</i>     | MSPOR6 Ga0207211_134131    | GTGCCAGCAGCTGCGGTAA | This study                 |
| <i>Pseudoceratina sp.</i>        | PCPOR1 Ga0206387_116928    | GTGCCAGCAGCTGCGGTAA | This study                 |
| <i>Pseudoceratina sp.</i>        | PCPOR2 Ga0207196_1125      | GTGCCAGCAGCTGCGGTAA | This study                 |
| <i>Pseudoceratina sp.</i>        | PCPOR2 Ga0207196_15322     | GTGCCAGCAGCTGCGGTAA | This study                 |
| <i>Pseudoceratina sp.</i>        | PCPOR2b Ga0206366_1461     | GTGCCAGCAGCTGCGGTAA | This study                 |
| <i>Pseudoceratina sp.</i>        | PCPOR4 Ga0207198_1187265   | GTGCCAGCAGCTGCGGTAA | This study                 |
| <i>Aplysina aerophoba</i>        | WGA-A3 POR_0001.00000030   | GTGCCAGCAGCTGCGGTAA | Kamke 2013 [9]             |
| <i>Aplysina aerophoba</i>        | WGA-4C POR4C_0180.00000040 | GTGCCAGCAGCTGCGGTAA | Kamke 2013 [9]             |
| <i>Aplysina aerophoba</i>        | WGA-4E POR4E_0050.00000080 | GTGCCAGCAGCTGCGGTAA | Kamke 2013 [9]             |
| <i>Aplysina aerophoba</i>        | WGA-4G POR4G_0091.00000100 | GTGCCAGCAGCTGCGGTAA | Kamke 2013 [9]             |
| <i>Aplysina aerophoba</i>        | AY713479.1                 | GTGCCAGCAGCTGCGGTAA | Fieseler 2006 [10]         |
| <i>Aplysina aerophoba</i>        | AY485280.1                 | GTGCCAGCAGCTGCGGTAA | Fieseler 2006 [10]         |
| <i>Astrosclera willeyana</i>     | HE985121.1                 | GTGCCAGCAGCTGCGGTAA | Karlinska-Batres 2013 [11] |
| <i>Vaceletia crypta</i>          | HE817802.1                 | GTGCCAGCAGCTGCGGTAA | Karlinska-Batres 2013 [11] |
| <i>Vaceletia crypta</i>          | HE817855.1                 | GTGCCAGCAGCTGCGGTAA | Karlinska-Batres 2013 [11] |
| <i>Vaceletia crypta</i>          | HE817858.1                 | GTGCCAGCAGCTGCGGTAA | Karlinska-Batres 2013 [11] |
| <i>Xestospongia testudinaria</i> | JN596759.1                 | GTGCCAGCAGCTGCGGTAA | Montalvo 2011 [12]         |
| <i>Ircinia fasciculata</i>       | JX206505.1                 | GTGCCAGCAGCTGCGGTAA | Erwin 2012 [13]            |
| <i>Aplysina cauliformis</i>      | KF286093.1                 | GTGCCAGCAGCTGCGGTAA | Olsen 2014 [14]            |

**Supplementary Figure 6c: 16S rRNA sequence mismatch localizations for primer 806RB.** This table contains additional partial sequences that could not be included in Supplementary Figure S6a because they did not cover all primers. Sequence identifiers beginning with "Ga02" and "POR" refer to JGI Integrated Microbial Genome Pipeline locus ids.

| <b>sponge host</b>               | <b>sequence_id</b>         | <b>sequence</b>             | <b>reference</b>      |
|----------------------------------|----------------------------|-----------------------------|-----------------------|
|                                  | <b>806RB</b>               | <b>GGACTACNVGGGTWTCTAAT</b> |                       |
| <i>Agelas tubulata</i>           | AGPOR5 Ga0227391_12124a    | GGACTAGCGGGGTATCTAAT        | This study            |
| <i>Dysidea granulosa</i>         | DGPOR9 Ga0236299_105113    | GGACTACCGGGGTATCTAAT        | This study            |
| <i>Meloplus sarasinorum</i>      | MSPOR6 Ga0207211_1479      | GGACTAGCGGGGTATCTAAT        | This study            |
| <i>Meloplus sarasinorum</i>      | MSPOR6 Ga0207211_134131    | GGACTAGCGGGGTATCTAAT        | This study            |
| <i>Pseudoceratina sp.</i>        | PCPOR1 Ga0206387_116928    | GGACTAGCGGGGTATCTAAT        | This study            |
| <i>Pseudoceratina sp.</i>        | PCPOR2 Ga0207196_1125      | GGACTAGCGGGGTATCTAAT        | This study            |
| <i>Pseudoceratina sp.</i>        | PCPOR2 Ga0207196_15322     | GGACTAGCGGGGTATCTAAT        | This study            |
| <i>Pseudoceratina sp.</i>        | PCPOR2b Ga0207198_1187265  | GGACTACCGGGGTATCTAAT        | This study            |
| <i>Pseudoceratina sp.</i>        | PCPOR4 Ga0207198_1187265   | GGACTAGCGGGGTATCTAAT        | This study            |
| <i>Aplysina aerophoba</i>        | WGA-A3 POR_0001.00000030   | GGACTAGCGGGGTATCTAAT        | Kamke 2013 [9]        |
| <i>Aplysina aerophoba</i>        | WGA-4C POR4C_0180.00000040 | GGACTAGCGGGGTATCTAAT        | Kamke 2013 [9]        |
| <i>Aplysina aerophoba</i>        | WGA-4E POR4E_0050.00000080 | GGACTACCGGGGTATCTAAT        | Kamke 2013 [9]        |
| <i>Aplysina aerophoba</i>        | WGA-4G POR4G_0091.00000100 | GGACTAGCGGGGTATCTAAT        | Kamke 2013 [9]        |
| <i>Aplysina aerophoba</i>        | AY713479.12035.13581       | GGACTAGCGGGGTATCTAAT        | Fieseler 2006 [10]    |
| <i>Aplysina aerophoba</i>        | AY485280.1                 | GGACTAGCGGGGTATCTAAT        | Fieseler 2006         |
| <i>Astrosclera willeyana</i>     | HE985121.1                 | GGACTAGCGGGGTATCTAAT        | Karlınska-Batres 2013 |
| <i>Vaceletia crypta</i>          | HE817802.1                 | GGACTACCGGGGTATCTAAT        | Karlıńska-Batres 2013 |
| <i>Vaceletia crypta</i>          | HE817855.1                 | GGACTAGCGGGGTATCTAAT        | Karlıńska-Batres 2013 |
| <i>Vaceletia crypta</i>          | HE817858.1                 | GGACTACCGGGGTATCTAAT        | Karlıńska-Batres 2013 |
| <i>Xestospongia testudinaria</i> | JN596759.1                 | GGACTAGCGGGGTATCTAAT        | Montalvo 2011 [12]    |
| <i>Ircinia fasciculata</i>       | JX206505.1                 | GGACTAGCGGGGTATCTAAT        | Erwin 2012 [13]       |
| <i>Aplysina cauliformis</i>      | KF286093.1                 | GGACTAGCGGGGTATCTAAT        | Olsen 2014 [14]       |

**Supplementary Table S1. Additional MIMAG properties of assembled genomes.** Abbreviations: SAG, single-cell genome; MAG metagenomic assembly genome. IMG, JGI Integrated Microbial Genome Pipeline . Taxonomic identification method for all genomes was "multi-marker".

| Genome  | NCBI accession number | IMG accession number | project type | assembly software       | annotation pipeline | MIMAG Genome Quality Rating | MAG binning software | MAG binning parameters               | SAG cell isolation | SAG lysis | SAG amplification |
|---------|-----------------------|----------------------|--------------|-------------------------|---------------------|-----------------------------|----------------------|--------------------------------------|--------------------|-----------|-------------------|
| PCPOR4  | PYIY00000000          | 2744054414           | MAG          | Celera Assembler v. 8.3 | PROKKA + IMG        | High                        | Custom               | Pct GC, coverage, DarkHorse taxonomy | na                 | na        | na                |
| PCPOR2  | PYJB00000000          | 2744054412           | MAG          | Celera Assembler v. 8.3 | PROKKA + IMG        | Med                         | Custom               | Pct GC, coverage, DarkHorse taxonomy | na                 | na        | na                |
| DGPOR9  | PYJF00000000          | 2765235806           | MAG          | Celera Assembler v. 8.3 | PROKKA + IMG        | Low                         | Custom               | Pct GC, coverage, DarkHorse taxonomy | na                 | na        | na                |
| PCPOR2b | PYIZ00000000          | 2740892555           | MAG          | Celera Assembler v. 8.3 | PROKKA + IMG        | High                        | Custom               | Pct GC, coverage, DarkHorse taxonomy | na                 | na        | na                |
| MSPOR6  | PYJD00000000          | 2744055035           | MAG          | Celera Assembler v. 8.3 | PROKKA + IMG        | Med                         | Custom               | Pct GC, coverage, DarkHorse taxonomy | na                 | na        | na                |
| PCPOR1  | PYJC00000000          | 2740892559           | MAG          | Celera Assembler v. 8.3 | PROKKA + IMG        | Med                         | Custom               | Pct GC, coverage, DarkHorse taxonomy | na                 | na        | na                |
| AGPOR5  | PYJE00000000          | 2758568595           | MAG          | Celera Assembler v. 8.3 | PROKKA + IMG        | Med                         | Custom               | Pct GC, coverage, DarkHorse taxonomy | na                 | na        | na                |

| Genome  | NCBI accession number | IMG accession number | project type | assembly software       | annotation pipeline | MIMAG Genome Quality Rating | MAG binning software | MAG binning parameters               | SAG cell isolation | SAG lysis              | SAG amplification |
|---------|-----------------------|----------------------|--------------|-------------------------|---------------------|-----------------------------|----------------------|--------------------------------------|--------------------|------------------------|-------------------|
| PCPOR2a | PYJA00000000          | 2744054413           | MAG          | Celera Assembler v. 8.3 | PROKKA + IMG        | Med                         | Custom               | Pct GC, coverage, DarkHorse taxonomy | na                 | na                     | na                |
| MPMS    | MPMS00000000          | na                   | MAG          | SPAdes v. 3.5.0         | PROKKA + IMG        | Low                         | CONCOCT v. 0.4.0     | coverage, composition                | na                 | na                     | na                |
| MPMY    | MPMY00000000          | na                   | MAG          | SPAdes v. 3.5.0         | PROKKA + IMG        | Med                         | CONCOCT v. 0.4.0     | coverage, composition                | na                 | na                     | na                |
| WGA-3G  | ASZN01000001          | 2265129009           | SAG          | Newbler vers. 1.1.03.24 | PROKKA + IMG        | Med                         | na                   | na                                   | flow cytometry     | freeze/thaw + alkaline | MDA               |
| WGA-4E  | AQTV00000000          | 2265129006           | SAG          | Newbler vers. 1.1.03.24 | PROKKA + IMG        | Med                         | na                   | na                                   | flow cytometry     | freeze/thaw + alkaline | MDA               |
| WGA-4C  | APGO00000000          | 2265129007           | SAG          | Newbler vers. 1.1.03.24 | PROKKA + IMG        | Low                         | na                   | na                                   | flow cytometry     | freeze/thaw + alkaline | MDA               |
| WGA-4G  | AQPC00000000          | 2265129008           | SAG          | Newbler vers. 1.1.03.24 | PROKKA + IMG        | Low                         | na                   | na                                   | flow cytometry     | freeze/thaw + alkaline | MDA               |
| WGA-A3  | ADFK00000000          | 2265129010           | SAG          | Newbler vers. 1.1.03.24 | PROKKA + IMG        | Low                         | na                   | na                                   | flow cytometry     | freeze/thaw + alkaline | MDA               |
| NP60    | PBTM00000000          | 2775506747           | MAG          | Minimus2                | PROKKA + IMG        | High                        | BinSanity            | coverage, composition                | na                 | na                     | na                |
| SP142   | PAQF00000000          | 2775506749           | MAG          | Minimus2                | PROKKA + IMG        | High                        | BinSanity            | coverage, composition                | na                 | na                     | na                |

| Genome  | NCBI accession number | IMG accession number | project type | assembly software | annotation pipeline | MIMAG Genome Quality Rating | MAG binning software | MAG binning parameters | SAG cell isolation | SAG lysis | SAG amplification |
|---------|-----------------------|----------------------|--------------|-------------------|---------------------|-----------------------------|----------------------|------------------------|--------------------|-----------|-------------------|
| RS423   | PBVO000000000         | 2775506743           | MAG          | Minimus2          | PROKKA + IMG        | Med                         | BinSanity            | coverage, compositon   | na                 | na        | na                |
| MED599  | NZIS000000000         | 2775506746           | MAG          | Minimus2          | PROKKA + IMG        | High                        | BinSanity            | coverage, compositon   | na                 | na        | na                |
| SAT10   | PAYP000000000         | 2775506750           | MAG          | Minimus2          | PROKKA + IMG        | High                        | BinSanity            | coverage, compositon   | na                 | na        | na                |
| NAT79   | NZUT000000000         | 2775506744           | MAG          | Minimus2          | PROKKA + IMG        | High                        | BinSanity            | coverage, compositon   | na                 | na        | na                |
| SAT1451 | PAVB000000000         | 2775506788           | MAG          | Minimus2          | PROKKA + IMG        | Med                         | BinSanity            | coverage, compositon   | na                 | na        | na                |
| NP41    | PBXZ000000000         | 2775506745           | MAG          | Minimus2          | PROKKA + IMG        | High                        | BinSanity            | coverage, compositon   | na                 | na        | na                |
| NAT81   | NZUQ000000000         | 2775506748           | MAG          | Minimus2          | PROKKA + IMG        | High                        | BinSanity            | coverage, compositon   | na                 | na        | na                |
| ARS61   | NYZG000000000         | 2775506754           | MAG          | Minimus2          | PROKKA + IMG        | Med                         | BinSanity            | coverage, compositon   | na                 | na        | na                |
| NAT1    | PACG000000000         | 2775506753           | MAG          | Minimus2          | PROKKA + IMG        | Med                         | BinSanity            | coverage, compositon   | na                 | na        | na                |
| ARS1035 | NZDP000000000         | 2775506752           | MAG          | Minimus2          | PROKKA + IMG        | Med                         | BinSanity            | coverage, compositon   | na                 | na        | na                |
| ARS87   | NYVD000000000         | 2775506751           | MAG          | Minimus2          | PROKKA + IMG        | Low                         | BinSanity            | coverage, compositon   | na                 | na        | na                |

**Supplementary Table S2. Tara oceans genome metadata.** Adapted from supplementary data tables linked to Tully et al [19] merged with supplementary information from Sunegawa et al [20] and NCBI Short Read Archive (SRA) metadata [21]. Biosample read source names separated by underscores signify the following abbreviations: Tara Oceans station identifier (e.g. tara038), filter size fraction (prot=0.8-5.0  $\mu\text{m}$ , bact =0.22-1.6  $\mu\text{m}$ ), and environmental feature (meso=mesopelagic zone, dcm=deep chlorophyll maximum layer, epi =epipelagic mixing layer).

| genome name | Genbank accession | NCBI Biosample id | Location             | num bio-samples co-assembled | Most abundant biosample read source | pct reads mapped to most abund. source | Date/Time           | Latitude [degrees North] | Longitude [degrees East] | Sampling depth [m] |
|-------------|-------------------|-------------------|----------------------|------------------------------|-------------------------------------|----------------------------------------|---------------------|--------------------------|--------------------------|--------------------|
| ARS87       | NYVD00000000      | SAMN07619756      | Arabian Sea          | 14                           | tara038_prot_meso                   | 81.4%                                  | 2010-03-16T06:13:30 | 19.0351                  | 64.5638                  | 340                |
| ARS61       | NYZG00000000      | SAMN07619755      | Arabian Sea          | 36                           | tara038_prot_meso                   | 76.5%                                  | 2010-03-16T06:13:30 | 19.0351                  | 64.5638                  | 340                |
| ARS1035     | NZDP00000000      | SAMN07619754      | Arabian Sea          | 36                           | tara037_prot_meso                   | 67.3%                                  | 2010-03-12T17:08:47 | 20.8457                  | 63.5851                  | 600                |
| MED599      | NZIS00000000      | SAMN07619757      | Mediterranean Sea    | 20                           | tara030_prot_dcm                    | 67.3%                                  | 2009-12-15T15:23:37 | 33.9235                  | 32.8118                  | 70                 |
| NAT81       | NZUQ00000000      | SAMN07619760      | North Atlantic Ocean | 74                           | tara149_prot_meso                   | 36.9%                                  | 2012-03-01T18:50:26 | 34.0771                  | -49.8233                 | 740                |
| NAT79       | NZUT00000000      | SAMN07619759      | North Atlantic Ocean | 33                           | tara151_prot_dcm                    | 36.9%                                  | 2012-03-09T17:42:29 | 36.1811                  | -28.9373                 | 80                 |
| NAT1        | PACG00000000      | SAMN07619758      | North Atlantic Ocean | 177                          | tara146_prot_meso                   | 36.8%                                  | 2012-02-16T12:01:25 | 34.6663                  | -71.2907                 | 640                |
| SP142       | PAQF00000000      | SAMN07619766      | South Pacific Ocean  | 18                           | tara125_prot_epi                    | 96.6%                                  | 2011-08-09T17:05:33 | -8.8999                  | -142.5461                | 140                |
| SAT1451     | PAVB00000000      | SAMN07619765      | South Atlantic Ocean | 38                           | tara078_bact_meso                   | 21.9%                                  | 2010-11-05T12:33:27 | -30.1471                 | -43.2915                 | 800                |
| SAT10       | PAYP00000000      | SAMN07619764      | South Atlantic Ocean | 30                           | tara076_bact_dcm                    | 38.6%                                  | 2010-10-16T16:58:37 | -21.0292                 | -35.3498                 | 150                |
| NP60        | PBTM00000000      | SAMN07619762      | North Pacific Ocean  | 41                           | tara137_prot_dcm                    | 88.9%                                  | 2011-12-03T14:31:20 | 14.2025                  | -116.6433                | 375                |
| RS423       | PBVO00000000      | SAMN07619763      | Red Sea              | 74                           | tara032_bact_dcm                    | 30.6%                                  | 2010-01-11T14:17    | 23.4183                  | 37.245                   | 80                 |
| NP41        | PBXZ00000000      | SAMN07619761      | North Pacific Ocean  | 30                           | tara138_prot_meso                   | 43.0%                                  | 2011-12-11T20:37:22 | 6.3559                   | -103.0598                | 450                |

**Supplementary Table S3. List of marker genes used to construct multi-locus taxonomic tree.**

| <b>function</b>                           | <b>aln len (aa)</b> |
|-------------------------------------------|---------------------|
| DNA-directed_RNA_polymerase_subunit_alpha | 349                 |
| protein_translocase_subunit_SecY          | 457                 |
| ribosomal_protein_L14                     | 127                 |
| ribosomal_protein_L15                     | 158                 |
| ribosomal_protein_L16                     | 138                 |
| ribosomal_protein_L17                     | 135                 |
| ribosomal_protein_L18                     | 122                 |
| ribosomal_protein_L2                      | 274                 |
| ribosomal_protein_L21                     | 120                 |
| ribosomal_protein_L22                     | 121                 |
| ribosomal_protein_L23                     | 99                  |
| ribosomal_protein_L24                     | 117                 |
| ribosomal_protein_L29                     | 234                 |
| ribosomal_protein_L3                      | 218                 |
| ribosomal_protein_L4                      | 217                 |
| ribosomal_protein_L5                      | 188                 |
| ribosomal_protein_L6                      | 227                 |
| ribosomal_protein_S10                     | 103                 |
| ribosomal_protein_S11                     | 124                 |
| ribosomal_protein_S12                     | 215                 |
| ribosomal_protein_S13                     | 183                 |
| ribosomal_protein_S15                     | 189                 |
| ribosomal_protein_S17                     | 103                 |
| ribosomal_protein_S19                     | 125                 |
| ribosomal_protein_S20                     | 127                 |
| ribosomal_protein_S3                      | 288                 |
| ribosomal_protein_S5                      | 176                 |
| ribosomal_protein_S8                      | 161                 |

Supplementary Table S4: Shared versus unique pathways/functions in *Entoporibacteria* and *Pelagiporibacteria*.

|                           | <b>Function</b>                               | <b>Ento-<br/>poribacteria</b> | <b>Pelagi-<br/>poribacteria</b> | <b>Key gene(s)</b>                                                                                                                                                       |
|---------------------------|-----------------------------------------------|-------------------------------|---------------------------------|--------------------------------------------------------------------------------------------------------------------------------------------------------------------------|
| <b>Central metabolism</b> | glycolysis                                    | +                             | +                               | Glyceraldehyde-3-phosphate dehydrogenase                                                                                                                                 |
|                           | tricarboxylic acid cycle                      | +                             | +                               | Aconitate hydratase                                                                                                                                                      |
|                           | oxidative pentose phosphate pathway           | +                             | +                               | glucose 6-phosphate dehydrogenase, 6-phosphogluconolactonase, 6-phosphogluconate dehydrogenase                                                                           |
|                           | non-oxidative pentose phosphate pathway       | +                             | +                               | Ribose-5-phosphate isomerase, Ribulose 5-Phosphate 3-Epimerase, transaldolase, transketolase                                                                             |
|                           | oxidative phosphorylation                     | +                             | +                               | Cytochrome c oxidase                                                                                                                                                     |
|                           | Entner-Doudoroff                              | +                             | +                               | glucose 1-dehydrogenase, gluconolactonase                                                                                                                                |
|                           | Wood-Ljungdahl pathway (reductive acetyl CoA) | +                             | +                               | Carbon monoxide dehydrogenase/acetyl-CoA synthase. methyltransferases                                                                                                    |
|                           | assimilatory sulfate reduction                | +                             | +                               | sulfite reductase, APS reductase (Adenylyl-sulfate reductase), ATP-sulfurylase (sulfate adenylyltransferase, adenylyltransferase/sulfurtransferase MoeZ), DMSO reductase |
|                           | assimilatory denitrification                  | +                             | +                               | assimilatory (ferredoxin)nitrates reductase (NarB); assimilatory nitrite reductase (NirA) ;                                                                              |
|                           | ammonia scavenging                            | +                             | +                               | glutamine synthase                                                                                                                                                       |
|                           |                                               |                               |                                 |                                                                                                                                                                          |
| <b>Vitamins/cofactors</b> | cobalamin (B12)                               | +                             | +                               | cobalamin synthesis protein cobW                                                                                                                                         |



|                         | <b>Function</b>                                          | <b>Ento-<br/>poribacteria</b> | <b>Pelagi-<br/>poribacteria</b> | <b>Key gene(s)</b>                                                                                                                                                                       |
|-------------------------|----------------------------------------------------------|-------------------------------|---------------------------------|------------------------------------------------------------------------------------------------------------------------------------------------------------------------------------------|
|                         | biotin                                                   | +                             | +                               | biotin synthase                                                                                                                                                                          |
|                         | thiamine                                                 | +                             | +                               | thiamine biosynthesis protein ThiI                                                                                                                                                       |
| <b>Nutrient sources</b> | mixed acid fermentation                                  | +                             | +                               | lactate dehydrogenase, pyruvate dehydrogenase, alcohol dehydrogenase, pyruvate-formate lyase, PEP carboxylase, malate dehydrogenase, Fumarate hydratase, fumarate reductase, menaquinone |
|                         | citrate fermentation                                     | +                             | +                               | citrate lyase/ 2-dehydro-3-deoxyglucarate aldolase                                                                                                                                       |
|                         | urea degradation                                         | +                             | +                               | urease, ABC urease transport gene cluster (UreA, UreB, UreC)                                                                                                                             |
|                         | algal wall degradation                                   | +                             | +                               | pectate lyase                                                                                                                                                                            |
|                         | algal wall degradation II                                | -                             | +                               | endo-1,4-beta-xylanase                                                                                                                                                                   |
|                         | propane/butane-diol utilization                          | +                             | +                               | 1,3-propanediol dehydrogenase, (R,R)-butanediol dehydrogenase, dihydrodiol dehydrogenase. Propanediol utilization protein PduA, propionaldehyde dehydrogenase                            |
|                         | methyl-citrate cycle (feeds propionyl-CoA into pyruvate) | +                             | -                               | [group 4 only] 2-methylcitrate synthase, 2-methylcitrate dehydratase                                                                                                                     |
|                         | trimethylamine (TMA) production                          | -                             | +                               | [group 6c only] Choline trimethylamine-lyase                                                                                                                                             |
|                         | Glutamate-ammonia-ligase adenylyltransferase             | +                             | +                               | uses ammonia as a nitrogen source for glutamate synthesis. ammonia might be generated by denitrification, rather than importing, except that there is an ammonia transporter             |

|                               | <b>Function</b>                 | <b>Ento-<br/>poribacteria</b> | <b>Pelagi-<br/>poribacteria</b> | <b>Key gene(s)</b>                                                                                                                                           |
|-------------------------------|---------------------------------|-------------------------------|---------------------------------|--------------------------------------------------------------------------------------------------------------------------------------------------------------|
| <b>Gram-negative envelope</b> | periplasm                       | +                             | +                               | TonB-dependent outer membrane receptor, preprotein translocase subunit SecA                                                                                  |
|                               | translocases                    | +                             | +                               | YajC, SecA, SecE, SecY, Sec-independent                                                                                                                      |
|                               | Sterol biosynthesis             | +                             | +                               | Squalene--hopene cyclase, oxidosqualene cyclase                                                                                                              |
|                               | membrane coat-like proteins     | +                             | +                               | gas vesicle protein, Biopolymer transport protein ExbB                                                                                                       |
|                               | peptidoglycan biosynthesis      | +                             | +                               | Undecaprenyldiphospho-muramoylpentapeptide beta-N-acetylglucosaminyltransferase, N-acetylneuraminate lyase                                                   |
|                               | lipopolysaccharide biosynthesis | +                             | +                               | 3-deoxy-D-manno-octulosonic acid transferase                                                                                                                 |
|                               | phospho-inositol-linked lipids  | +                             | +                               | myo-inositol-1-phosphate synthase, phosphatidylinositol mannoside acyltransferase, CDP-diacylglycerol--inositol 3-phosphatidyltransferase, inosose isomerase |
|                               | capsule assembly                | +                             | +                               | Capsule biosynthesis protein CapA, capsule assembly protein Wzi                                                                                              |
|                               | O-antigen synthesis             | -                             | +                               | perosamine synthase                                                                                                                                          |
| <b>Type II secretion</b>      | type II protein secretion       | +                             | +                               | type II secretion system proteins C, D, E, F, G, I, PulK                                                                                                     |

|                       | <b>Function</b>                   | <b>Ento-<br/>poribacteria</b> | <b>Pelagi-<br/>poribacteria</b> | <b>Key gene(s)</b>                                                                                                                                                                                                                                                                                                                                                                                                  |
|-----------------------|-----------------------------------|-------------------------------|---------------------------------|---------------------------------------------------------------------------------------------------------------------------------------------------------------------------------------------------------------------------------------------------------------------------------------------------------------------------------------------------------------------------------------------------------------------|
| <b>Motility</b>       | flagellar assembly                | -                             | +                               | Flagellar basal body rod protein FlgB,C,D,G,Flagellar biosynthesis protein FlhA,B,F,Flagellar biosynthetic protein FliP,Q,R,Flagellar brake protein YcgR,Flagellar filament core protein,Flagellar hook protein,Flagellar hook-basal body complex protein FliE,Flagellar L-ring protein,Flagellar M-ring protein,Flagellar P-ring protein,Flagellar protein FliS,Flagellin,Flagellum site-determining protein YlxH, |
|                       | chemotaxis                        | -                             | +                               | Chemotaxis protein CheW, Chemotaxis protein methyltransferase, Chemotaxis protein PomA                                                                                                                                                                                                                                                                                                                              |
| <b>Sporulation</b>    | dispersal, dessication protection | +                             | +                               | stage II sporulation proteins E and M, inner spore coat protein H, SpoIIAA, SpoIVB , SpoVE, Spore protein SP21                                                                                                                                                                                                                                                                                                      |
| <b>Osmoprotection</b> | ectoine metabolism                | +                             | +                               | Ectoine dioxygenase (multiple copies, ectoine_ectB: diaminobutyrate--2-oxoglutarate aminotransferase - 1st step in ectoine biosynthesis, ectoine_eutB: ectoine utilization protein EutB, ectoine_eutD: ectoine utilization protein EutD,                                                                                                                                                                            |
|                       | trehalose import                  | +                             | +                               | Trehalose transport system permease protein SugA, trehalose utilisation protein                                                                                                                                                                                                                                                                                                                                     |
|                       | glycine betaine metabolism        | +                             | +                               | Choline-sulfatase                                                                                                                                                                                                                                                                                                                                                                                                   |

|                                         | <b>Function</b>                                                 | <b>Ento-<br/>poribacteria</b> | <b>Pelagi-<br/>poribacteria</b> | <b>Key gene(s)</b>                                                                                                                           |
|-----------------------------------------|-----------------------------------------------------------------|-------------------------------|---------------------------------|----------------------------------------------------------------------------------------------------------------------------------------------|
|                                         | osmotic stress sensing                                          | +                             | +                               | Small Conductance Mechanosensitive Ion Channel (MscS) Family                                                                                 |
| <b>Bacterial proteasome</b>             | protein turnover                                                | +                             | +                               | Proteasome subunit alpha, Proteasome subunit beta, Pup deamidase/depupylase, Pup--protein ligase                                             |
| <b>Adhesion</b>                         | adhesins characteristic of eukaryotic cell surfaces             | +                             | +                               | concanavalin A-like lectin, Ig-like domain, internalin-A, leucine-rich repeats, fibronectin type III domain, PH (Pleckstrin Homology) domain |
|                                         | sialic acid decoration/cleavage                                 | +                             | +                               | N-acetylneuraminase lyase                                                                                                                    |
| <b>Extracellular matrix degradation</b> | cellulosome (cell wall-anchored extracellular enzyme complexes) | +                             | +                               | dockerin, cohesin domain-containing protein                                                                                                  |
|                                         | GAG (glucose amino glycan) degradation                          |                               |                                 | N-acetylglucosamine-6-sulfatase, N-acetyl-galactosamine-4-sulfatase, N-sulfoglucosamine-sulfohydrolase                                       |
|                                         | arylsulfatase                                                   | +                             | +                               |                                                                                                                                              |
|                                         | cerebroside-sulfatase                                           | +                             | +                               |                                                                                                                                              |
|                                         | collagenase                                                     | +                             | +                               |                                                                                                                                              |
|                                         | ceramidase                                                      | +                             | +                               |                                                                                                                                              |
|                                         | chitinase                                                       | +                             | +                               |                                                                                                                                              |
|                                         | heparinase                                                      | +                             | -                               |                                                                                                                                              |
| <b>DNA exchange</b>                     | DNA uptake competence                                           | +                             | +                               | Competence protein ComM, ComE operon protein 1                                                                                               |
|                                         | type IV pilus assembly protein PilM, PilB, PilC, PilF           | +                             | +                               |                                                                                                                                              |
|                                         | plasmid support                                                 | +                             | +                               | F plasmid transfer operon protein TraF                                                                                                       |

|                         | <b>Function</b>                                  | <b>Ento-<br/>poribacteria</b> | <b>Pelagi-<br/>poribacteria</b> | <b>Key gene(s)</b>                                                                                 |
|-------------------------|--------------------------------------------------|-------------------------------|---------------------------------|----------------------------------------------------------------------------------------------------|
| <b>Phage defense</b>    | Restriction enzymes/modification methylases      | +                             | +                               | See Supplementary Table 5                                                                          |
|                         | Modification methylases (restriction associated) | +                             | +                               | See Supplementary Table 5                                                                          |
|                         | CRISPR-associated                                | +                             | +                               | Cas, Cmr families                                                                                  |
| <b>Bacterial toxins</b> | bacteriocins                                     | +                             | +                               | subtilosin biosynthesis protein Alba, ABC-type bacteriocin/lantibiotic exporter                    |
|                         | toxin de-activation                              | +                             | +                               | Macrolide export, Daunorubicin/doxorubicin resistance, penicillin amidase, microcystin degradation |

**Supplementary Table S5:** List of HMM pattern identifiers used to identify endonucleases and transposases

### Transposase HMMs

| Accession  | Name            | Description                                        |
|------------|-----------------|----------------------------------------------------|
| PF04693.11 | DDE Tnp 2       | Archaeal putative transposase ISC1217              |
| PF03400.12 | DDE Tnp IS1     | IS1 transposase                                    |
| PF12762.6  | DDE Tnp IS1595  | ISXO2-like transposase domain                      |
| PF07592.10 | DDE Tnp ISAZ013 | Rhodopirellula transposase DDE domain              |
| PF13340.5  | DUF4096         | Putative transposase of IS4/5 family (DUF4096)     |
| PF13022.5  | HTH Tnp 1 2     | Helix-turn-helix of insertion element transposase  |
| PF13542.5  | HTH Tnp ISL3    | Helix-turn-helix domain of transposase family ISL3 |
| PF10551.8  | MULE            | MULE transposase domain                            |
| PF01385.18 | OrfB IS605      | Probable transposase                               |
| PF07282.10 | OrfB Zn ribbon  | Putative transposase DNA-binding domain            |
| PF12784.6  | PDDEXK 2        | PD-(D/E)XK nuclease family transposase             |
| PF04754.11 | Transposase 31  | Putative transposase, YhgA-like                    |
| PF13005.6  | zf-IS66         | zinc-finger binding domain of transposase IS66     |

### Endonuclease HMMs

| Accession  | Name            | Description                                     |
|------------|-----------------|-------------------------------------------------|
| PF07582.11 | AP endonuc 2 N  | AP endonuclease family 2 C terminus             |
| PF06616.10 | BsuBI PstI RE   | BsuBI/PstI restriction endonuclease C-terminus  |
| PF13358.5  | DDE 3           | DDE superfamily endonuclease                    |
| PF13546.5  | DDE 5           | DDE superfamily endonuclease                    |
| PF13359.5  | DDE Tnp 4       | DDE superfamily endonuclease                    |
| PF04556.11 | DpnII           | DpnII restriction endonuclease                  |
| PF02963.15 | EcoRI           | Restriction endonuclease EcoRI                  |
| PF10576.8  | EndIII 4Fe-2S   | Iron-sulfur binding domain of endonuclease III  |
| PF09195.10 | Endonuc-BglII   | Restriction endonuclease BglII                  |
| PF09194.9  | Endonuc-BsobI   | Restriction endonuclease BsobI                  |
| PF09124.9  | Endonuc-dimeris | T4 recombination endonuclease VII, dimerisation |
| PF09233.10 | Endonuc-EcoRV   | Restriction endonuclease EcoRV                  |
| PF04493.13 | Endonuclease 5  | Endonuclease V                                  |
| PF02945.14 | Endonuclease 7  | Recombination endonuclease VII                  |
| PF01223.22 | Endonuclease NS | DNA/RNA non-specific endonuclease               |

| <b>Accession</b> | <b>Name</b>     | <b>Description</b>                                           |
|------------------|-----------------|--------------------------------------------------------------|
| PF10107.8        | Endonuc Holl    | Endonuclease related to archaeal Holliday junction resolvase |
| PF03372.22       | Exo_endo_phos   | Endonuclease/Exonuclease/phosphatase family                  |
| PF14529.5        | Exo_endo_phos_2 | Endonuclease-reverse transcriptase                           |
| PF01844.22       | HNH             | HNH endonuclease                                             |
| PF13391.5        | HNH_2           | HNH endonuclease                                             |
| PF13392.5        | HNH_3           | HNH endonuclease                                             |
| PF13395.5        | HNH_4           | HNH endonuclease                                             |
| PF14279.5        | HNH_5           | HNH endonuclease                                             |
| PF13613.5        | HTH_Tnp_4       | Helix-turn-helix of DDE superfamily endonuclease             |
| PF00961.18       | LAGLIDADG_1     | LAGLIDADG endonuclease                                       |
| PF03161.12       | LAGLIDADG_2     | LAGLIDADG DNA endonuclease family                            |
| PF04471.11       | Mrr_cat         | Restriction endonuclease                                     |
| PF13156.5        | Mrr_cat_2       | Restriction endonuclease                                     |
| PF15515.5        | MvaI_BcnI       | MvaI/BcnI restriction endonuclease family                    |
| PF01939.15       | NucS            | Endonuclease NucS                                            |
| PF05367.10       | Phage_endo_I    | Phage endonuclease I                                         |
| PF11463.7        | R-HINP1I        | R.HinP1I restriction endonuclease                            |
| PF09549.9        | RE_Bpu10I       | Bpu10I restriction endonuclease                              |
| PF09516.9        | RE_CfrBI        | CfrBI restriction endonuclease                               |
| PF14511.5        | RE_EcoO109I     | Type II restriction endonuclease EcoO109I                    |
| PF09554.9        | RE_HaeII        | HaeII restriction endonuclease                               |
| PF09519.9        | RE_HindVP       | HindVP restriction endonuclease                              |
| PF09568.9        | RE_MjaI         | MjaI restriction endonuclease                                |
| PF09565.9        | RE_NgoFVII      | NgoFVII restriction endonuclease                             |
| PF09522.9        | RE_R_Pab1       | R.Pab1 restriction endonuclease                              |
| PF09569.9        | RE_ScaI         | ScaI restriction endonuclease                                |
| PF09520.9        | RE_TdeIII       | Type II restriction endonuclease, TdeIII                     |
| PF09572.9        | RE_XamI         | XamI restriction endonuclease                                |
| PF15650.5        | Tox-REase-9     | Restriction endonuclease fold toxin 9                        |
| PF05685.11       | Uma2            | Putative restriction endonuclease                            |
| PF03851.13       | UvdE            | UV-endonuclease UvdE                                         |
| PF03852.14       | Vsr             | DNA mismatch endonuclease Vsr                                |
| PF04555.12       | XhoI            | Restriction endonuclease XhoI                                |

## References

1. Lafi, F.F., et al., *Widespread distribution of poribacteria in demospongiae*. Appl Environ Microbiol, 2009. **75**(17): p. 5695-9.
2. Steinert, G., et al., *Coexistence of poribacterial phylotypes among geographically widespread and phylogenetically divergent sponge hosts*. Environ Microbiol Rep, 2017.
3. Rodriguez-R, L.M., and Konstantinos T. Konstantinidis, *Bypassing Cultivation To Identify Bacterial Species*. Microbe, 2014. **9**(3): p. 111-8.
4. Lane, D.J., *16S/23S rRNA sequencing*, in *Nucleic acid techniques in bacterial systematics*. , E. Stackebrandt and M. Goodfellow, Editors. 1991, John Wiley and Sons,: New York, NY. p. 115-175.
5. Klindworth, A., et al., *Evaluation of general 16S ribosomal RNA gene PCR primers for classical and next-generation sequencing-based diversity studies*. Nucleic Acids Res, 2013. **41**(1): p. e1.
6. Earth\_Microbiome\_Project. *Earth Microbiome Project Protocols and Standards :16S Illumina Amplicon Protocol*. 2016 November 2016 December 2017]; Available from: <http://press.igsb.anl.gov/earthmicrobiome/protocols-and-standards/16s/>.
7. Nossa CW, et al., *Design of 16S rRNA gene primers for 454 pyrosequencing of the human foregut microbiome*. World journal of gastroenterology: WJG, 2010. **16**: p. 4135-44.
8. Degnan, P.H. and H. Ochman, *Illumina-based analysis of microbial community diversity*. ISME J, 2012. **6**(1): p. 183-94.
9. Kamke, J., et al., *Single-cell genomics reveals complex carbohydrate degradation patterns in poribacterial symbionts of marine sponges*. ISME J, 2013. **7**(12): p. 2287-300.
10. Fieseler, L., et al., *Analysis of the first genome fragment from the marine sponge-associated, novel candidate phylum Poribacteria by environmental genomics*. Environ Microbiol, 2006. **8**(4): p. 612-24.
11. Karlinska-Batres, K. and G. Worheide, *Phylogenetic diversity and community structure of the symbionts associated with the coralline sponge *Astrosclera willeyana* of the Great Barrier Reef*. Microb Ecol, 2013. **65**(3): p. 740-52.
12. Montalvo, N.F. and R.T. Hill, *Sponge-associated bacteria are strictly maintained in two closely related but geographically distant sponge hosts*. Appl Environ Microbiol, 2011. **77**(20): p. 7207-16.
13. Erwin, P.M., et al., *Stability of sponge-associated bacteria over large seasonal shifts in temperature and irradiance*. Appl Environ Microbiol, 2012. **78**(20): p. 7358-68.
14. Olson, J.B., R.W. Thacker, and D.J. Gochfeld, *Molecular community profiling reveals impacts of time, space, and disease status on the bacterial community associated with the Caribbean sponge *Aplysina cauliformis**. FEMS Microbiol Ecol, 2014. **87**(1): p. 268-79.
15. Parks, D.H., et al., *CheckM: assessing the quality of microbial genomes recovered from isolates, single cells, and metagenomes*. Genome Res, 2015. **25**(7): p. 1043-55.
16. Slaby, B.M., et al., *Metagenomic binning of a marine sponge microbiome reveals unity in defense but metabolic specialization*. ISME J, 2017. **11**(11): p. 2465-2478.
17. Siegl, A., et al., *Single-cell genomics reveals the lifestyle of Poribacteria, a candidate phylum symbiotically associated with marine sponges*. ISME J, 2011. **5**(1): p. 61-70.
18. Tully, B.J., E.D. Graham, and J.F. Heidelberg, *The reconstruction of 2,631 draft metagenome-assembled genomes from the global oceans*. Sci Data, 2018. **5**: p. 170203.



19. Tully, B.J., E.D. Graham, and J.F. Heidelberg, *The Reconstruction of 2,631 Draft Metagenome-Assembled Genomes from the Global Oceans*, in *bioRxiv*. 2017.
20. Sunagawa, S., et al., *Ocean plankton. Structure and function of the global ocean microbiome*. *Science*, 2015. **348**(6237): p. 1261359.
21. Leinonen, R., et al., *The sequence read archive*. *Nucleic Acids Res*, 2011. **39**(Database issue): p. D19-21.
